# Supplementary material for: Engineering Cu/NiCu LDH Heterostructure Nanosheet Arrays for Highly-Efficient Water Oxidation
Source: MDPI journal article supplement (doi:10.3390/ma16093372), 2023-04-25
Supplement: s1 [file s1]

# Engineering Cu/NiCu LDH Heterostructure Nanosheet Arrays for Highly-Efficient Water Oxidation

Ao-Bing Wang <sup>1</sup>, Xin Zhang <sup>1</sup>, Hui-Juan Xu <sup>1,\*</sup>, Li-Jun Gao <sup>1</sup>, Li Li <sup>1</sup>, Rui Cao <sup>1</sup>  
and Qiu-Yan Hao <sup>2,\*</sup>

<sup>1</sup> Hebei Key Laboratory of Man-Machine Environmental Thermal Control Technology and Equipment, Hebei Vocational University of Technology and Engineering, Xingtai 054000, China

<sup>2</sup> School of Materials Science and Engineering, Hebei University of Technology, Tianjin 300130, China

\* Correspondence: xuhuijuan\_xpc@163.com (H.-J.X.); haoqiuyan@hebut.edu.cn (Q.-Y.H.)

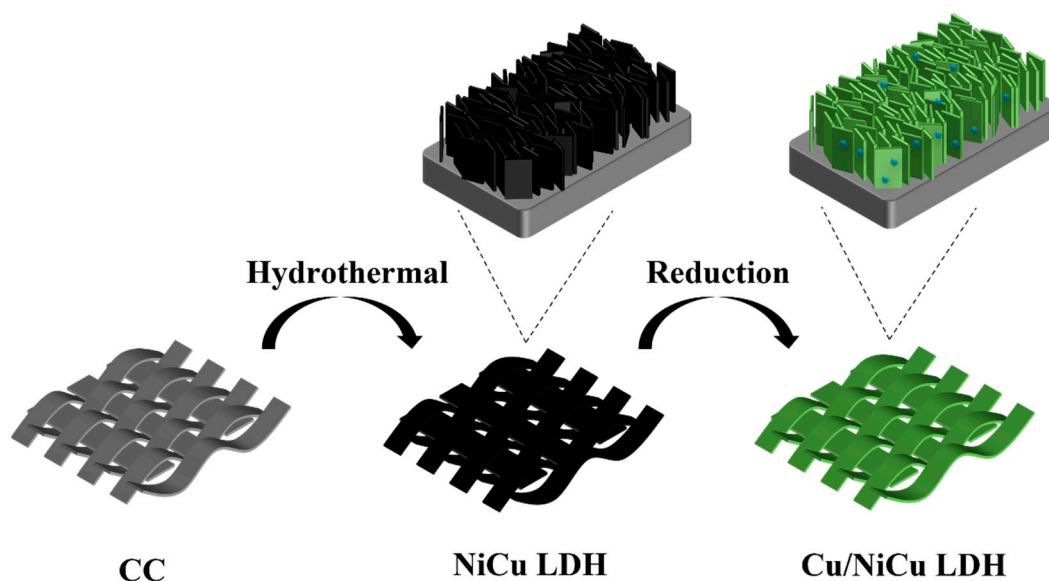

**Figure S1.** Schematic diagram of the preparation process of Cu/NiCu LDH.

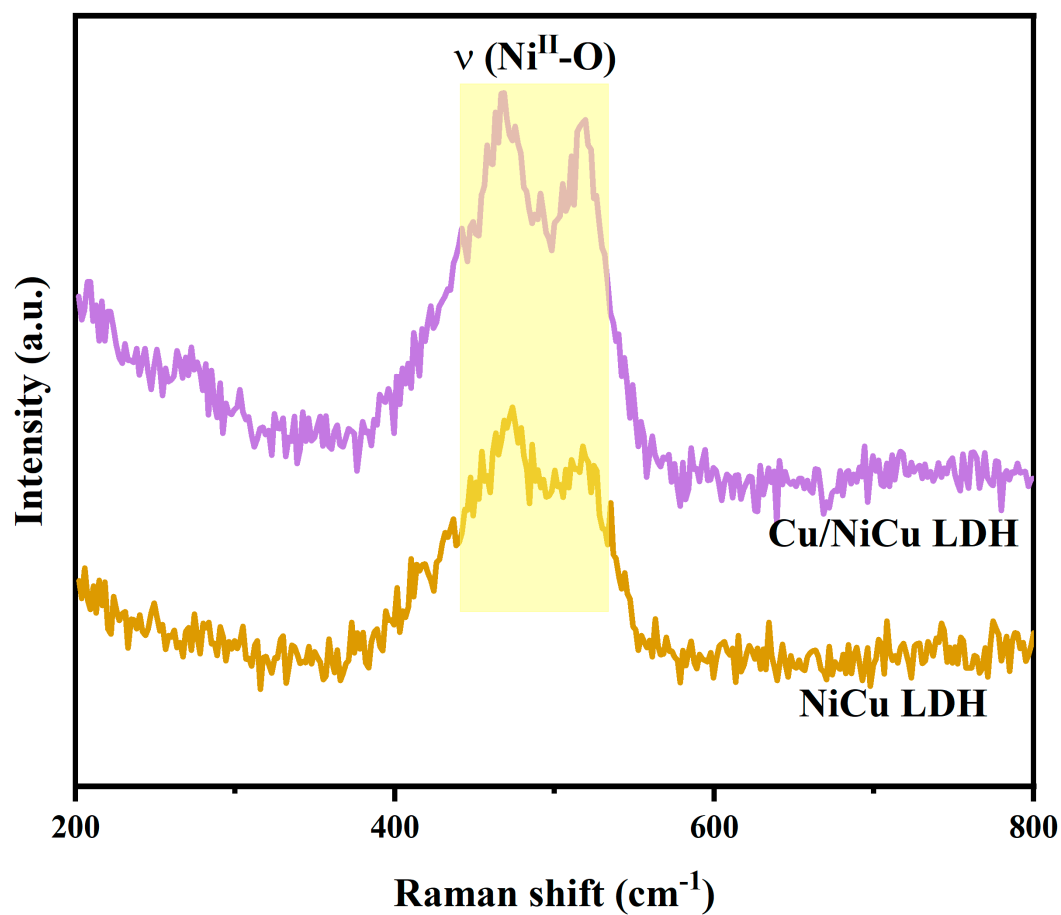

**Figure S2.** Raman spectrum of the synthesized NiCu LDH and Cu/NiCu LDH.

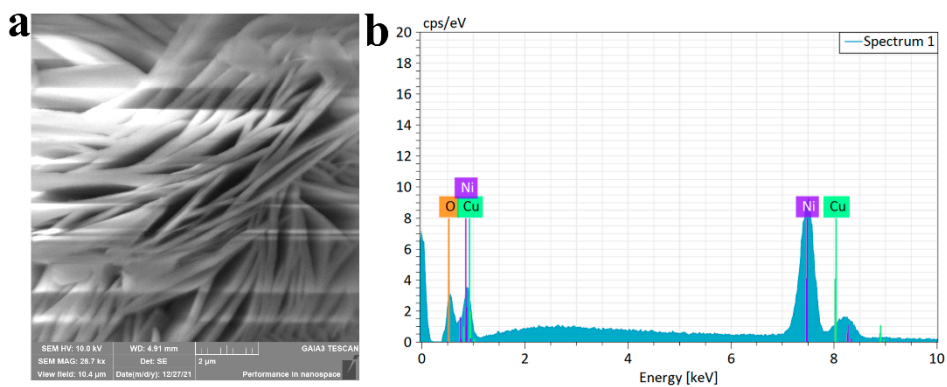

**Figure S3.** (a) SEM image and (b) EDS spectrum of NiCu LDH.

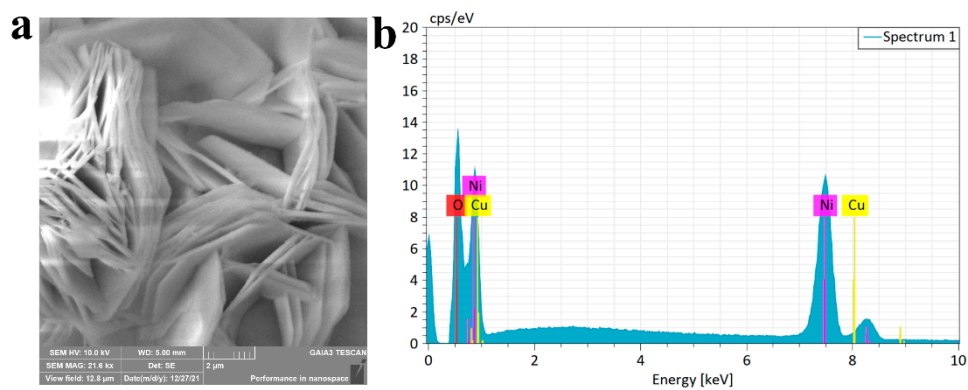

**Figure S4.** (a) SEM image and (b) EDS spectrum of  $\text{Cu}_{1.25}/\text{NiCu}$  LDH.

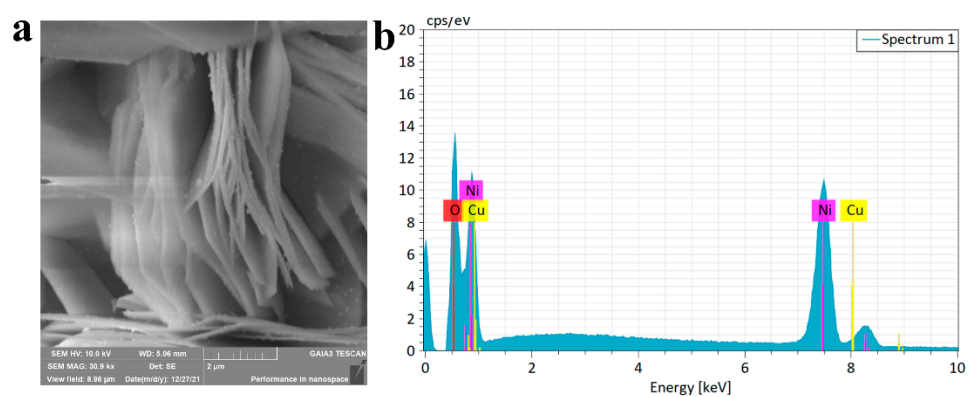

**Figure S5.** EDS spectrum of  $\text{Cu}_{2.5}/\text{NiCu}$  LDH.

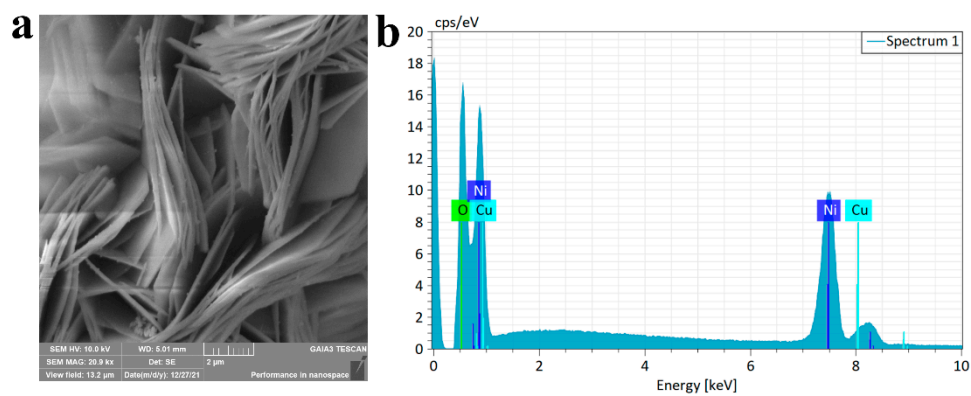

**Figure S6.** (a) SEM image and (b) EDS spectrum of  $\text{Cu}_5/\text{NiCu}$  LDH.

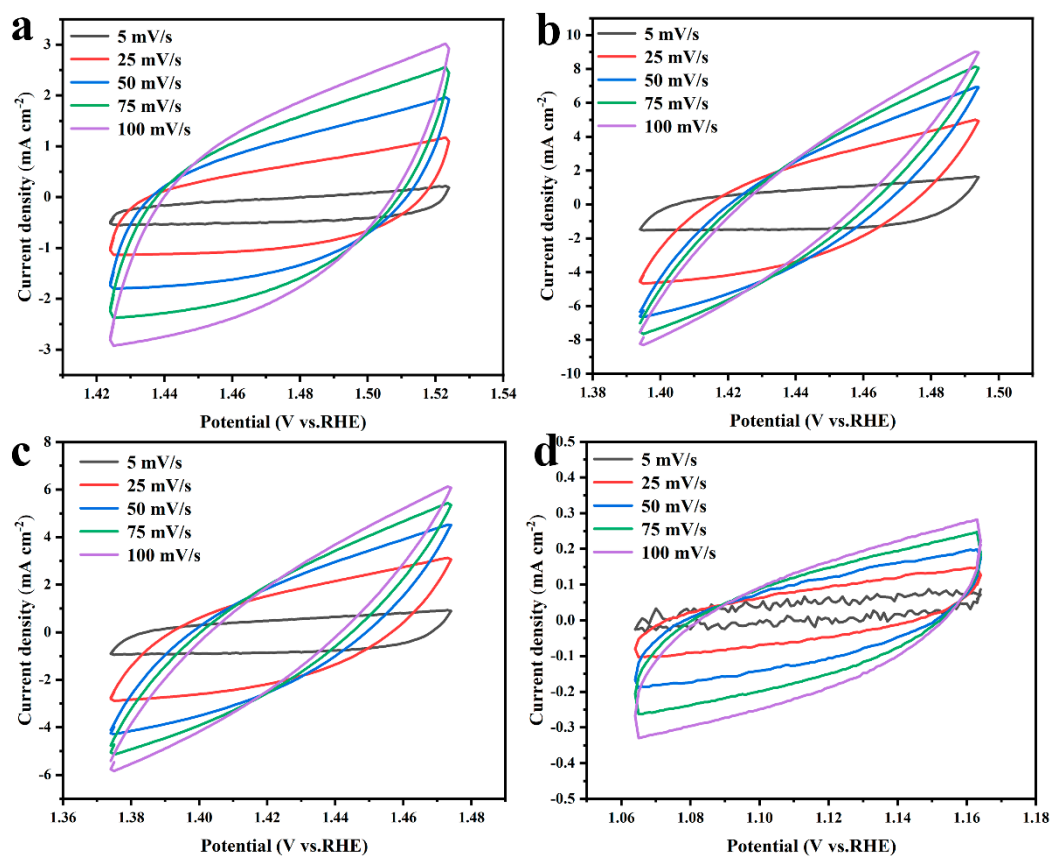

**Figure S7.** CV curves of (a) NiCu LDH, (b)  $\text{Cu}_{1.25}/\text{NiCu}$  LDH, (c)  $\text{Cu}_{2.5}/\text{NiCu}$  LDH and (d)  $\text{Cu}_5/\text{NiCu}$  LDH.

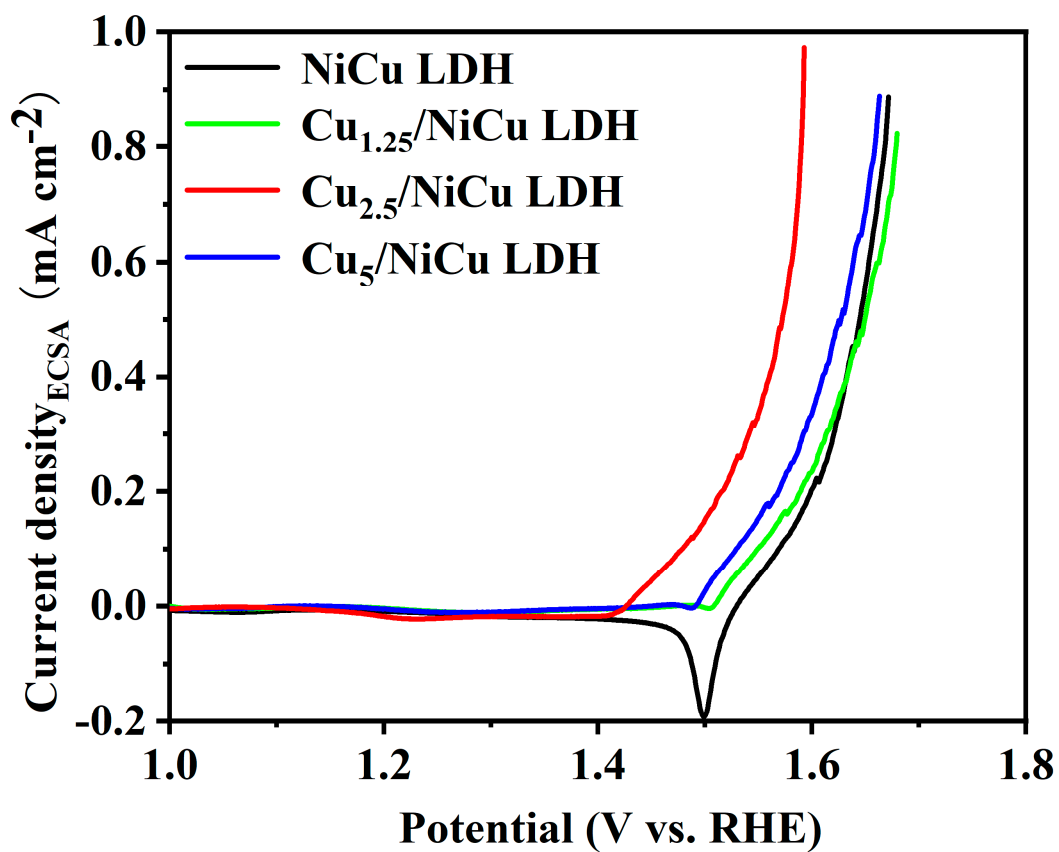

**Figure S8.** Normalized LSV curves using the ECSA value of Cu/NiCu LDH, Cu<sub>1.25</sub>/NiCu LDH, Cu<sub>2.5</sub>/NiCu LDH and Cu<sub>5</sub>/NiCu LDH.

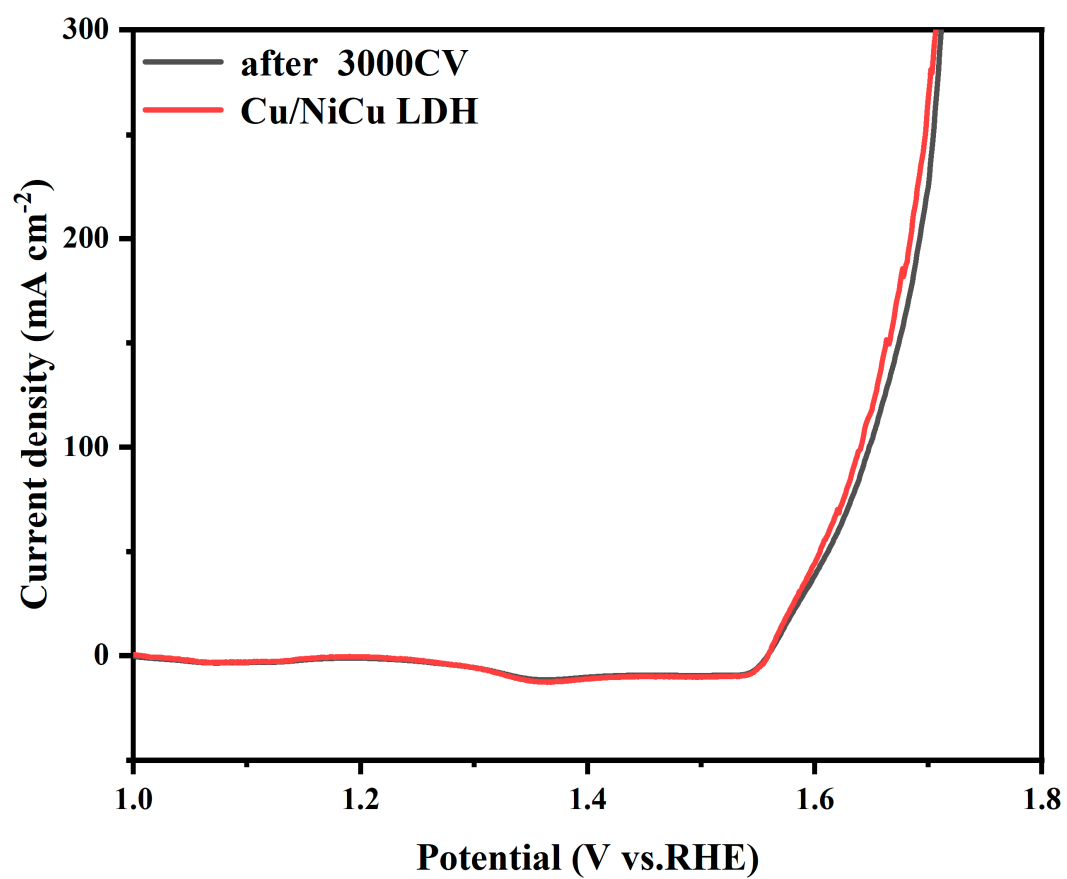

**Figure S9.** The LSV curves of Cu/NiCu LDH before and after 3000 CV tests.

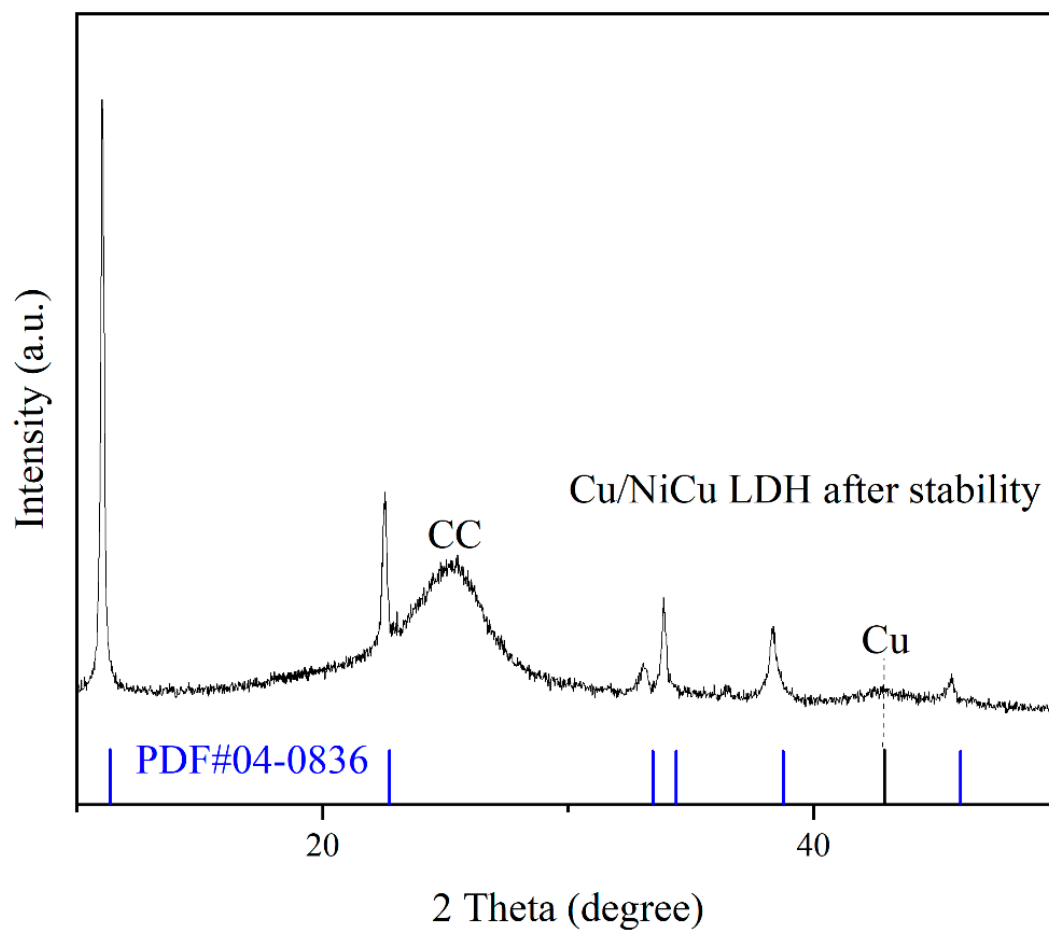

**Figure S10.** XRD pattern of  $\text{Cu}_{2.5}/\text{NiCu}$  LDH after stability test.

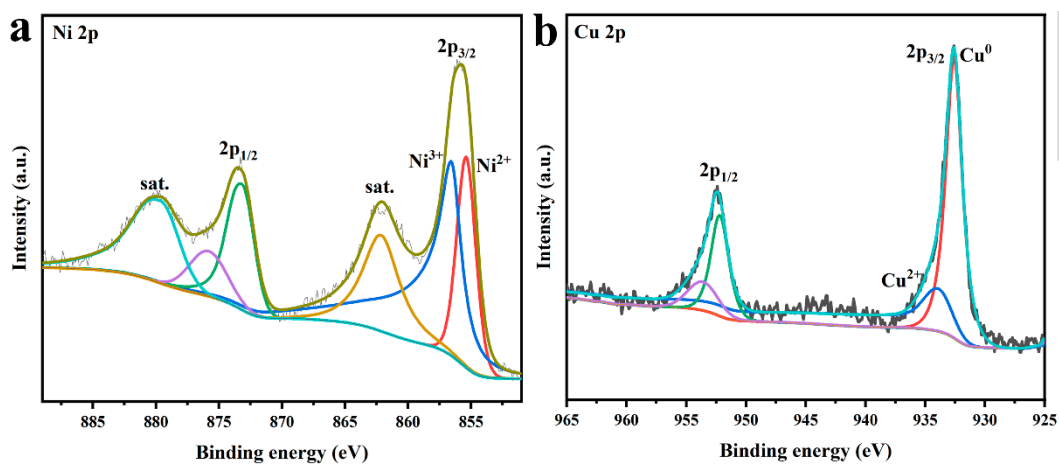

**Figure S11.** (a) Ni 2p and (b) Cu 2p XPS spectra of  $\text{Cu}_{2.5}/\text{NiCu}$  LDH after stability.

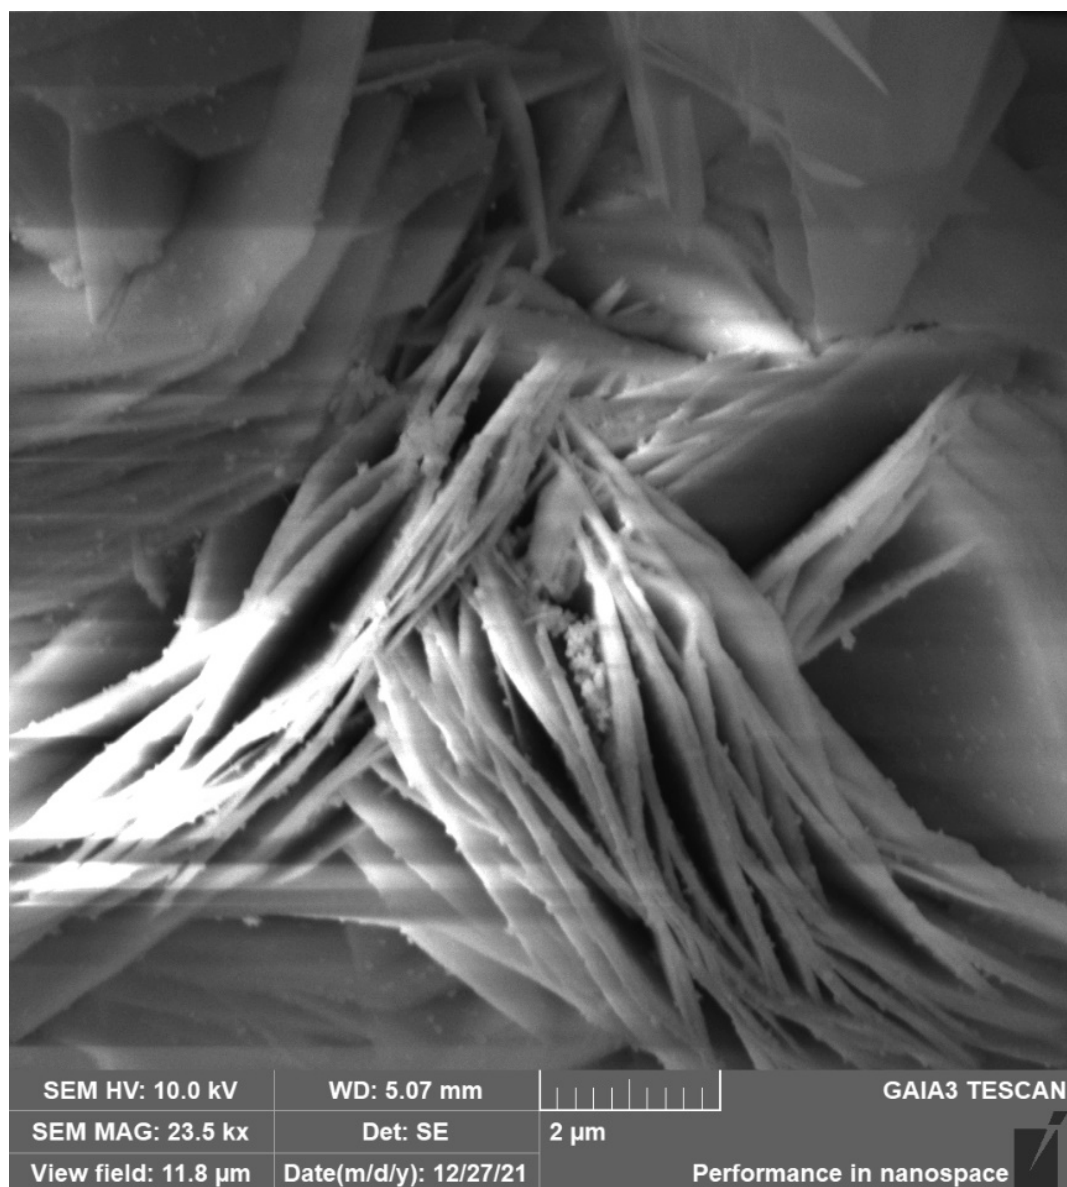

**Figure S12.** SEM image of  $\text{Cu}_{2.5}/\text{NiCu}$  LDH after stability test.

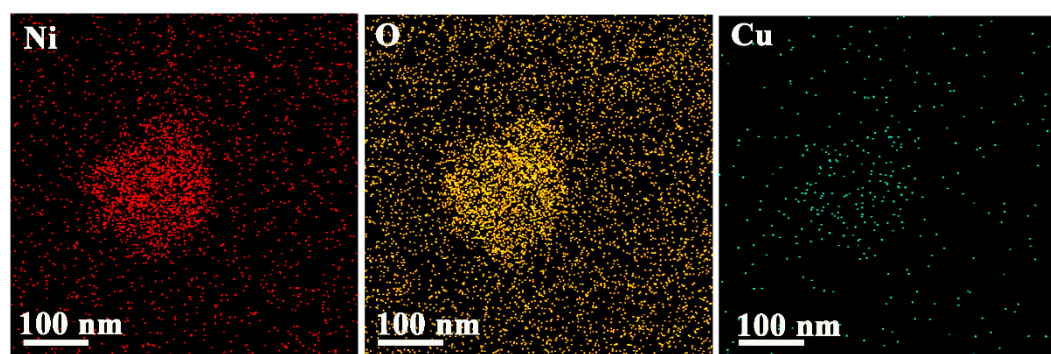

**Figure S13.** Element mapping of  $\text{Cu}_{2.5}/\text{NiCu}$  LDH after stability test.



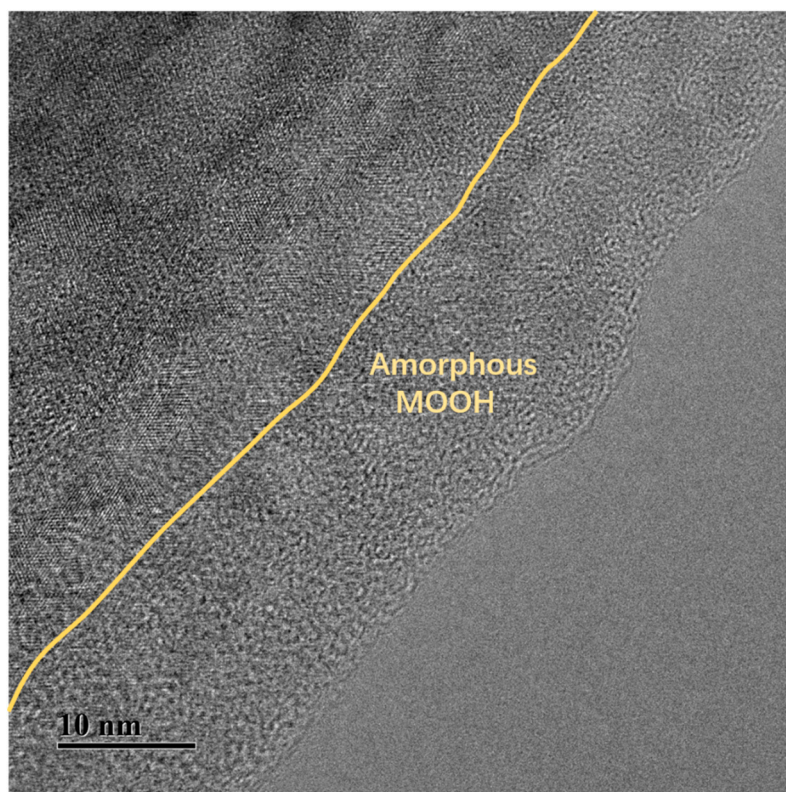

**Figure S14.** HRTEM image of  $\text{Cu}_{2.5}/\text{NiCu}$  LDH after stability test.

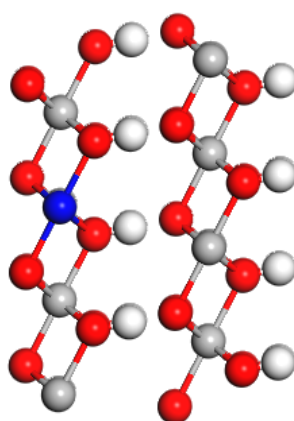

**Figure S15.** Constructed model of  $\text{NiCuOOH}$ .

**Table S1.** EDS results of  $\text{NiCu}$  LDH,  $\text{Cu}_{1.25}/\text{NiCu}$  LDH,  $\text{Cu}_{2.5}/\text{NiCu}$  LDH and  $\text{Cu}_5/\text{NiCu}$  LDH.

|                                    | Ni (at%) | Cu(at%) | O (at%) |
|------------------------------------|----------|---------|---------|
| $\text{NiCu}$ LDH                  | 34.58    | 1.08    | 64.34   |
| $\text{Cu}_{1.25}/\text{NiCu}$ LDH | 25.94    | 1.95    | 72.10   |

|                                                  |       |      |       |
|--------------------------------------------------|-------|------|-------|
| Cu <sub>2.5</sub> /NiCu LDH                      | 27.86 | 2.52 | 69.62 |
| Cu <sub>5</sub> /NiCu LDH                        | 30.34 | 6.14 | 63.52 |
| Cu <sub>2.5</sub> /NiCu LDH after stability test | 20.7  | 2.31 | 76.99 |

**Table S2.** Comparison of OER performances of Cu<sub>2.5</sub>/NiCu LDH with previously reported well-performed OER electrocatalysts.

| Catalysts                              | $\eta@10 \text{ mA cm}^{-2}$<br>(mV) | Electrolyte | Substrate | Ref.      |
|----------------------------------------|--------------------------------------|-------------|-----------|-----------|
| Cu <sub>2.5</sub> /NiCu LDH            | 206                                  | 1M KOH      | CC        | This work |
| Mxene/NiFe LDH                         | 260                                  | 1M KOH      | RDE       | [1]       |
| GDY/NiFe LDH                           | 260                                  | 1M KOH      | CF        | [2]       |
| Pt/NiFe LDH                            | 230                                  | 1M KOH      | CC        | [3]       |
| Ni <sub>2</sub> Cr <sub>1</sub> LDH/NF | 319                                  | 1M KOH      | NF        | [4]       |
| S–NiFe LDH/CC                          | 206                                  | 1M KOH      | CC        | [5]       |
| Ni/LDH-ZnO                             | 210                                  | 1M KOH      | NF        | [6]       |
| Exfoliated NiFe LDH                    | 302                                  | 1M KOH      | GC        | [7]       |
| NiO/NiFe LDH                           | 270                                  | 1M KOH      | GC        | [8]       |
| Fe–Ni LDH/MOFs                         | 255                                  | 1M KOH      | GC        | [9]       |

Glassy carbon (GC); Ni foam (NF); carbon cloth (CC); Cu foam (CF); rotating disk electrode (RDE).

**Table S3.** ECSA values of NiCu LDH, Cu<sub>1.25</sub>/NiCu LDH, Cu<sub>2.5</sub>/NiCu LDH and Cu<sub>5</sub>/NiCu LDH.

|             | NiCu LDH | Cu <sub>1.25</sub> /NiCu LDH | Cu <sub>2.5</sub> /NiCu LDH | Cu <sub>5</sub> /NiCu LDH |
|-------------|----------|------------------------------|-----------------------------|---------------------------|
| ECSA values | 324.75   | 447.75                       | 523.25                      | 415.5                     |

## Reference

1. Yu, M.; Zhou, S.; Wang, Z.; Zhao, J.; Qiu, J., Boosting electrocatalytic oxygen evolution by synergistically coupling layered double hydroxide with MXene. *Nano Energy* **2018**, 44, 181-190.
2. Shi, G.; Yu, C.; Fan, Z.; Li, J.; Yuan, M., Graphdiyne-Supported NiFe Layered Double Hydroxide Nanosheets as Functional Electrocatalysts for Oxygen Evolution. *ACS Appl. Mater. Inter.* **2019**, 11, 2662-2669.
3. Anantharaj, S.; Karthick, K.; Venkatesh, M.; Simha, T. V. S. V.; Salunke, A. S.; Ma, L.; Liang, H.; Kundu, S., Enhancing electrocatalytic total water splitting at few layer Pt-NiFe layered double hydroxide interfaces. *Nano Energy* **2017**, 39, 30-43.
4. Ye, W.; Fang, X.; Chen, X.; Yan, D., A three-dimensional nickel-chromium layered double hydroxide micro/nanosheet array as an efficient and stable bifunctional electrocatalyst for overall water splitting. *Nanoscale* **2018**, 10, 19484-19491.
5. Cao, L.-M.; Wang, J.-W.; Zhong, D.-C.; Lu, T.-B., Template-directed synthesis of sulphur doped NiCoFe layered double hydroxide porous nanosheets with enhanced electrocatalytic activity for the oxygen evolution reaction. *J. Mater. Chem. A* **2018**, 6, 3224-3230.
6. Luo, Y.; Wu, Y.; Wu, D.; Huang, C.; Xiao, D.; Chen, H.; Zheng, S.; Chu, P. K., NiFe-Layered Double Hydroxide Synchronously Activated by Heterojunctions and Vacancies for the Oxygen Evolution Reaction. *ACS Appl. Mater. Inter.* **2020**, 12, 42850-42858.
7. Song, F.; Hu, X., Exfoliation of layered double hydroxides for enhanced oxygen evolution catalysis. *Nat. Commun.* **2014**, 5, 4477.
8. Gao, Z.-W.; Liu, J.-Y.; Chen, X.-M.; Zheng, X.-L.; Mao, J.; Liu, H.; Ma, T.; Li, L.; Wang, W.-C.; Du, X.-W., Engineering NiO/NiFe LDH Intersection to Bypass Scaling Relationship for Oxygen Evolution Reaction via Dynamic Tridimensional Adsorption of Intermediates. *Adv. Mater.* **2019**, 31, 1804769.

9. Huo, J.; Wang, Y.; Yan, L.; Xue, Y.; Li, S.; Hu, M.; Jiang, Y.; Zhai, Q.-G., In situsemi-transformation from heterometallic MOFs to Fe-Ni LDH/MOF hierarchical architectures for boosted oxygen evolution reaction. *Nanoscale* **2020**, 12,14514-14523.
